# Supplementary material for: A novel tetratricopeptide repeat protein, WHITE TO GREEN1, is required for early chloroplast development and affects RNA editing in chloroplasts
Source: PubMed Central journal article supplement (PMC5854136; doi:10.1093/jxb/erx383), 2017-11-11
Supplement: erx383_suppl_supplementary_figures_s1_s5_tables_s1_s3.pdf [file erx383_suppl_supplementary_figures_s1_s5_tables_s1_s3.pdf]

## Supplementary data

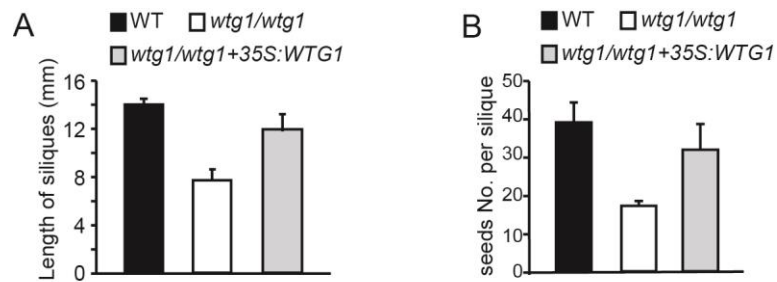

**Figure S1. Loss of *WTG1* reduces the yield trait of *Arabidopsis*.** (A) The length of siliques from wild-type, *wtg1*, and complementary lines. (B) Seed setting ability of wild type, *wtg1*, and complementary lines. Data are presented as mean  $\pm$  SD of triplicates.

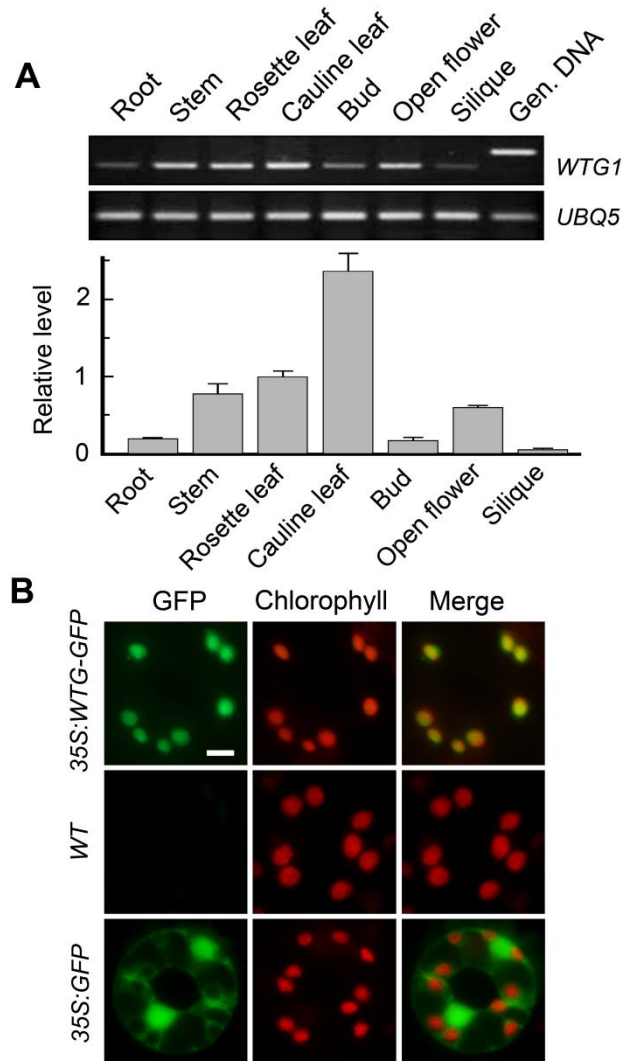

**Figure S2. WTG1 is expressed ubiquitously in *Arabidopsis* and targeted to chloroplasts.** (A) Reverse-transcriptase PCR (upper) and real-time PCR (bottom) assays of *WTG1*. *UBQ5* served as the loading control; data are presented as mean  $\pm$  SD of triplicates. (B) Subcellular localization of WTG1-GFP in transformed mesophyll cells. Chlorophyll autofluorescence is shown in red. The image appears yellow where the signals from GFP and chloroplasts overlap. Bars = 10  $\mu$ m.

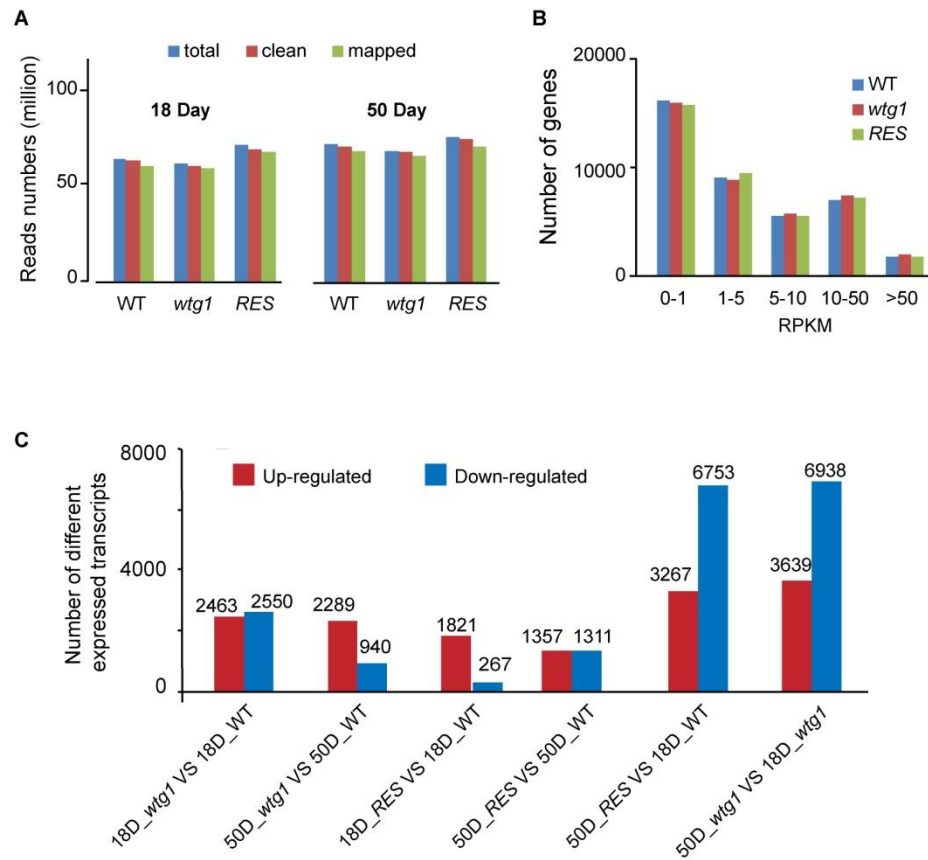

**Figure S3. RNA-seq analysis of wild-type and *wtg1* leaves** (A) Read numbers of sample sequences. (B) Frequencies of detected genes sorted according to their expression levels. (C) Number of differentially expressed transcripts.

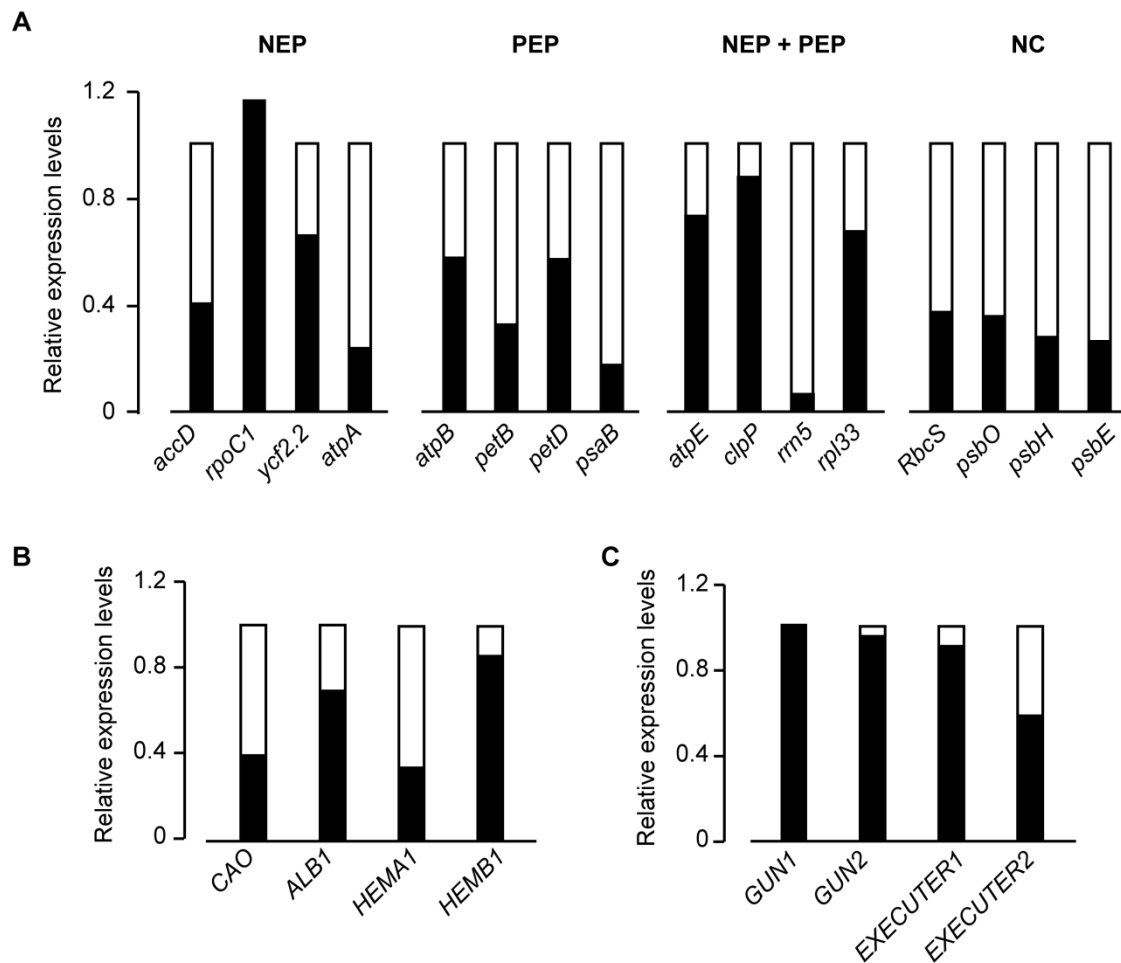

**Figure S4. Transcript analysis of chloroplast-associated genes in 18-day-old *wtg1* by RNA-seq.** The relative expression levels are represented by the RNA-seq fold change values with *wtg1* in black bars and WT in white bars (fold change value = 1). (A) The expression levels of plastid genes transcribed by nuclear-encoded polymerase (NEP), plastid-encoded polymerase (PEP), both nuclear-encoded and plastid-encoded polymerase (NEP + PEP) and nuclear-encoded chloroplast genes (NC). (B) The expression levels of chlorophyll biosynthesis genes. (C) The expression levels of genes involved in retrograde signaling.

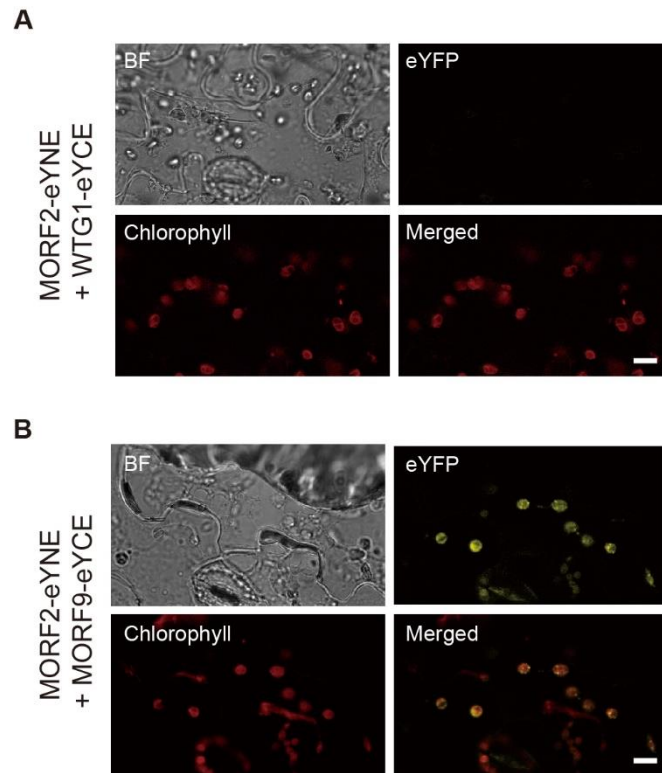

**Figure S5. Controls for the Bimolecular fluorescence complementation assay.** (A)

The negative control showed no interactions between WTG1 and MORF2. (B) The interaction between MORF2 and MORF9 was used as the positive control (Takenaka *et al.*, 2012). Chlorophyll autofluorescence is shown in red in (A) and (B). Bars = 5  $\mu\text{m}$ .

**Table S1 List of primers used in this study.**

| <b>Primer name</b> | <b>Sequences (5'-3')</b>             | <b>Purpose</b> |
|--------------------|--------------------------------------|----------------|
| 53080cds_L1        | CGCGGATCCATGGTGTCTCTAACTCTC          |                |
| 53080link_R1       | GACTAGACCTCCGCCGTAGCTAAGACTCTGCTTG   |                |
| linkGFP_L1         | GCCGGCGGAGGTCTAGTCATGGTGAGCAAGGGCGAG |                |
| linkGFP_R1         | CGCGTCGACTTACTTGTACAGCTCGTCC         |                |
| BamHI-53080-F      | CACGGATCC ATGGTGTCTCTAACTCTCTCC      |                |
| 53080- EcoR1-R     | CCCGAATTC CTAGTAGCTAAGACTCTGCTTG     |                |
| L1                 | TGGCAGTGTGTTTGTTCACG                 |                |
| R1                 | TTGAGCAGAAGTTTACCGAG                 |                |
| L2                 | TGTCCTTGTGCCTTCTCG                   |                |
| R2                 | GAAGGAAGTTGAAAATGGAT                 |                |
| 071495-LP          | CCTCAAAAGACGACAAACCTG                |                |
| 071495-RP          | GAAGCCGTTATTGAGGAGGAG                |                |
| 006120-LP          | TGCTTCAGCAGCTTTACCTTC                |                |
| 006120-RP          | TTTCAGGGCAAATCAATCAAG                |                |
| 015164-LP          | TCAGGATATAGCTGGTGGTGG                | RT-PCR         |
| 015164-RP          | GAGGTGGAAAACTCTGGCTC                 |                |
| LBa1               | TGGTTCACGTAGTGGGCCATCG               | RT-PCR         |
| UBQ5F              | AAGGTTACGCGTTTGAGGAAGG               |                |
| UBQ5R              | TCTTCTGGTAAACGTAGGTGAGTC             | RT-PCR         |
| Y2H-EcoRI-53080F   | GCGAATTCATGGTGTCTCTAACTCTCT          |                |
| Y2H-53080-SalIR    | GCGTCGACCTAGTAGCTAAGACTCTGCT         |                |
| Y2H-EcoRI-otp82F   | GCGAATTCATGATGCTCT CGTGTCTCC         |                |
| Y2H-otp82-BamHIR   | GCGGATCCCTACCAGTAGTCATTGCAGG         |                |
| Y2H-EcoRI-morf2F   | GCGAATTCATGGCTTTGC CTTTGTCTGG        |                |
| Y2H-morf2-SacIR    | GCGAGCTCTCATCTTGTGTTTTCTCTGC         |                |
| Y2H-EcoRI-morf8F   | GCGAATTCATGGCGACGC ATACCATTTC        |                |
| Y2H-morf8-BamHIR   | GCGGATCCTTAACCCTGGTAGGGGTTC          |                |
| Y2H-EcoRI-morf9F   | GC GAATTCATGGCTTCCT TCACAACAAC       |                |
| Y2H-morf9-BamHIR   | GCGGATCCTTAAGAGGAATCAGAGGCTG         |                |
| Y2H-EcoRI-orrm1F   | GCGAATTCATGGAAGCTC TTATTGCTTC        |                |
| Y2H-orrm1-BamHIR   | GCGGATCCCTAGAGCCCGAACTTGGTT          |                |
| Y2H-NdeI-OZ1F      | GGCATATGATGAACAACCT CCACCAGACT       |                |
| Y2H-OZ1-BamHIR     | GCGGATCCTCATTTATCTCCTTACCAG          |                |
| Y2H-EcoRI-ppo1-F   | GCGAATTCATGGAGTTAT CTCTTCTCCG        |                |
| Y2H-ppo1-BamHI-R   | GCGGATCCTTACTTGTAAAGCGTACCGTG        |                |
| BiFC-BamHI-53080F  | CGCCACTAGTGGATCCATGGTGTCTCTAACTCTCT  |                |

|                               |                                       |
|-------------------------------|---------------------------------------|
| BiFC-53080-SalIR              | TACCCTCGAGGTCGACGTAGCTAAGACTCTGCTTGT  |
| BiFC-BamHI-morf2F             | CGCCACTAGTATGGCTTTGC CTTTGTCTGG       |
| BiFC-morf2-SalIR              | TACCCTCGAGTCATCTTGTGTTTTCTCTGC        |
| BiFC-BamHI-morf8F             | CGCCACTAGTGGATCCATGGCGACGCATACCATTTC  |
| BiFC-morf8-SalIR              | TACCCTCGAGGTCGACACCCTGGTAGGGGTTGCCAC  |
| BiFC-BamHI-morf9F             | CGCCACTAGTGGATCCATGGCTTCCTTCACAACAAC  |
| BiFC-morf9-SalIR              | TACCCTCGAG GTCGACAGAGGAATCAGAGGCTGCTG |
| petL-pyro-F                   | AACATATTTTATTGAGTCCCTTC               |
| petL-pyro-R<br>(biotinylated) | TTGCTTAGACCAATAAACAGAAC               |
| ndhG-pyro-F                   | GATTTTCTTTTAGTTTTTCTGGG               |
| ndhG-pyro-R<br>(biotinylated) | TACAAACAAGAACAAATCCTAAG               |
| petLq-F                       | ATGCCTACTATAACTAGTTATTTTC             |
| petLq-R                       | TCAAATAAGTCGTATTTTGCTTAG              |
| ndhGq-F                       | TGGTACGGGGTTATTTGGACTAC               |
| ndhGq-R                       | CACCTATCAAAGCAACTAAAAGAATT            |
| 18srRNA-F                     | AAACGGCTACCACATCCAAG                  |
| 18srRNA-R                     | ACTCGAAAGAGCCCGGTATT                  |
| psaB-F                        | GGACCCCACTACTCGTCGTA                  |
| psaB-R                        | ATTGCTAATTGCCCGAAATG                  |
| psaD-F                        | GATCTTCAACTCCGCCATAA                  |
| psaD-R                        | ATCCCACGGGAGCTTCTTTC                  |
| Lhca1-F                       | CAGGAATGGGCAGCACTA                    |
| Lhca1-R                       | GCAATGGCTAAGAACTCAAT                  |
| Lhcb2-F                       | CTCCCCAAAGCATCTGGTAT                  |
| Lhcb2-R                       | CCCATCTGCTGTGGATTACTT                 |
| psbA-F                        | CCTATGGGGTCGCTTCTGTA                  |
| psbA-R                        | GAGCAGCAATGAATGCGATA                  |
| psbB-F                        | CGTGCGACTTTGAAATCTGA                  |
| psbB-R                        | TAGCACCATGCCAAATGTGT                  |
| atpC1-F                       | CGTGGATTATGTGGTGGAA                   |
| atpC1-R                       | GCTTCTTTAGCCGTAGGT                    |
| atpB-F                        | GAGCTCGTATGAGAGTTGGT                  |
| atpB-R                        | ACCCAATAAGGCGGATACCT                  |
| atpE-F                        | TCCACAAGAAGCTCAGCAAA                  |
| atpE-R                        | GTGTCCGAGCTCGTCTGAG                   |
| petC-F                        | CAAGTGGGTTGTTTGTGA                    |

|           |                               |      |
|-----------|-------------------------------|------|
| petC-R    | AAGCATGTAGCCAGTAGGT           |      |
| petD-F    | TCCTTTTGCAACTCCTTTGG          | qPCR |
| petD-R    | CCGCTGGTACTGAAACCATT          |      |
| rbcS-F    | CTTCCTGACCTTACCGATTC          |      |
| rbcS-R    | CGGGTGAGTTACCGTGCT            |      |
| rbcL-F    | GTGTTGGGTTCAAAGCTGGT          |      |
| rbcL-R    | CATCGGTCCACACAGTTGTC          |      |
| ndhB-F    | GGCCTATATTTCTTGGTTTCAATAG     |      |
| ndhB-R    | AATCGGGTTCATTGATATTCCTG       |      |
| ndhI-F    | GTCAACAAACCCTACGAG            |      |
| ndhI-R    | ACATACTTCACAAGCAAT            |      |
| rpoA-F    | CAAGCCGACA CAATAGGCAT         |      |
| rpoA-R    | AGCGCGTTGCGCGTTCCATA          |      |
| rpoB-F    | GCAGGTTAGAATTAGAGATTGATA      |      |
| rpoB-R    | GGGTAGCAAACATTCTCTAGAAT       |      |
| rpoC1-F   | GCCTAGTATACTGCGATTTTTTC       |      |
| rpoC1-R   | CTCGATTTCGAAATATATCGAAAC      |      |
| rrn16-F   | CGGTATCTGGGGAATAAGCA          |      |
| rrn16-R   | GATTTGACGGCGGACTTAAA          |      |
| rrn23-F   | GGGCGACTGTTTACCAAAAA          |      |
| rrn23-R   | TTACCCGACAAGGAATTTTCG         |      |
| rpl24-F   | TTGTCGGTGCTACTTTGG            |      |
| rpl24-R   | CTCGTCCTTGGTCTTCTTGATT        |      |
| rpl16-F   | AACACTTGAACCCGCTTGG           |      |
| rpl16-R   | GCGTTTCCGCAGGTCTTA            |      |
| rps17-F   | CCCGAACCACAGAATGCC            |      |
| rps17-R   | TCCACCGCCACAGTCTTG            |      |
| petL-A-F  | AGTACTTTAAGAAACATATGTA        |      |
| petL-A-R  | TCAAATAAGTCGTATTTTGCT         |      |
| ndhG-B-F  | AAACAGCCTAATACTAATAA          |      |
| ndhG-B-R  | TATATTATTAATAAAGAAAAATCG      |      |
| ndhG-C-F  | TAATATAATGGATTTGCCTGGACCAATAC |      |
| ndhG-C-R  | GGGAAGTAATACCACTCCCAG         |      |
| ndhG-D-F  | AACCCAATATTTTCAGCCTTTTC       |      |
| ndhG-D-R  | GAAAAGGCTGAAAATATTGGGTT       |      |
| petB-nc-F | TTCATCGATGGTCGGCAAG           |      |
| petB-nc-R | TGCGGTCAATACACCCAGAA          |      |

---



**Table S2. Plastid RNA editing sites affected in the *wtg1* mutant plants.**

All 34 reported editing sites in *Arabidopsis* plastid were detected by bulk sequencing. The affected sites, *petL-50* and *ndhG-5*, are shown in bold.

| Editing site     | Locus | Editing extent in wild-type (%) | Editing extent in <i>wtg1</i> (%) | Related editing factors                     | References                                                                                                                                                                      |
|------------------|-------|---------------------------------|-----------------------------------|---------------------------------------------|---------------------------------------------------------------------------------------------------------------------------------------------------------------------------------|
| <i>matK-640</i>  | 2931  | 90                              | 90                                | QED1 (PPR), MORF2, MORF9, ORRM1, OZ1        | (Tillich <i>et al.</i> , 2005; Takenaka <i>et al.</i> , 2012; Sun <i>et al.</i> , 2013; Sun <i>et al.</i> , 2015; Wagoner <i>et al.</i> , 2015)                                 |
| <i>atpF-92</i>   | 12707 | 100                             | 100                               | AEF1 (PPR), MORF2, MORF9                    | (Tillich <i>et al.</i> , 2005; Chateigner-Boutin & Small, 2007; Takenaka <i>et al.</i> , 2012)                                                                                  |
| <i>rpoC1-488</i> | 21806 | 30                              | 30                                | DOT4 (PPR), MORF2, MORF8, MORF9, OZ1, PPO1  | (Tillich <i>et al.</i> , 2005; Bentolila <i>et al.</i> , 2012; Takenaka <i>et al.</i> , 2012; Hayes <i>et al.</i> , 2013; Zhang <i>et al.</i> , 2014; Sun <i>et al.</i> , 2015) |
| <i>rpoB-2432</i> | 23898 | 90                              | 90                                | QED1 (PPR), MORF2, MORF8, MORF9, ORRM1, OZ1 | (Tillich <i>et al.</i> , 2005; Bentolila <i>et al.</i> , 2012; Takenaka <i>et al.</i> , 2012; Sun <i>et al.</i> , 2013; Sun <i>et al.</i> , 2015; Wagoner <i>et al.</i> , 2015) |
| <i>rpoB-551</i>  | 25779 | 90                              | 90                                | CRR22 (PPR), MORF2, MORF9, ORRM1, OZ1       | (Tillich <i>et al.</i> , 2005; Okuda <i>et al.</i> , 2009; Takenaka <i>et al.</i> , 2012; Zhang <i>et al.</i> , 2014; Sun <i>et al.</i> , 2015)                                 |
| <i>rpoB-338</i>  | 25992 | 90                              | 90                                | YS1 (PPR), MORF2, MORF9, OZ1, PPO1          | (Tillich <i>et al.</i> , 2005; Zhou <i>et al.</i> , 2009; Takenaka <i>et al.</i> , 2012; Zhang <i>et al.</i> , 2014; Sun <i>et al.</i> , 2015)                                  |

|                      |       |     |     |                                                   |                                                                                                                                                                                                                                          |
|----------------------|-------|-----|-----|---------------------------------------------------|------------------------------------------------------------------------------------------------------------------------------------------------------------------------------------------------------------------------------------------|
| <i>psbZ-50</i>       | 35800 | 100 | 100 | OTP84 (PPR), MORF2, MORF9, OZ1, PPO1              | (Chateigner-Boutin & Small, 2007; Hammani <i>et al.</i> , 2009; Takenaka <i>et al.</i> , 2012; Zhang <i>et al.</i> , 2014; Sun <i>et al.</i> , 2015)                                                                                     |
| <i>rps14-80</i>      | 37161 | 100 | 100 | MORF2, MORF9                                      | (Tillich <i>et al.</i> , 2005; Takenaka <i>et al.</i> , 2012)                                                                                                                                                                            |
| <i>rps14-149</i>     | 37092 | 100 | 100 | OTP86 (PPR), MORF2, MORF9                         | (Tillich <i>et al.</i> , 2005; Hammani <i>et al.</i> , 2009; Takenaka <i>et al.</i> , 2012)                                                                                                                                              |
| <i>accD-794</i>      | 57868 | 100 | 100 | RARE1/AtECB2 (PPR), MORF2, MORF8, MORF9, OZ1      | (Tillich <i>et al.</i> , 2005; Robbins <i>et al.</i> , 2009; Yu <i>et al.</i> , 2009; Tseng <i>et al.</i> , 2010; Bentolila <i>et al.</i> , 2012; Takenaka <i>et al.</i> , 2012; Sun <i>et al.</i> , 2015; Wagoner <i>et al.</i> , 2015) |
| <i>accD-3'UTR</i>    | 58642 | 80  | 80  | QED1/AtECB2 (PPR), MORF2, MORF9, ORRM1, OZ1       | (Chateigner-Boutin & Small, 2007; Robbins <i>et al.</i> , 2009; Tseng <i>et al.</i> , 2010; Takenaka <i>et al.</i> , 2012; Sun <i>et al.</i> , 2013; Sun <i>et al.</i> , 2015; Wagoner <i>et al.</i> , 2015)                             |
| <i>psbF-77</i>       | 63985 | 100 | 100 | LPA66 (PPR), MORF2, MORF9, OZ1                    | (Tillich <i>et al.</i> , 2005; Cai <i>et al.</i> , 2009; Takenaka <i>et al.</i> , 2012; Sun <i>et al.</i> , 2015)                                                                                                                        |
| <i>psbE-214</i>      | 64109 | 100 | 100 | CREF3 (PPR), MORF2                                | (Tillich <i>et al.</i> , 2005; Takenaka <i>et al.</i> , 2012; Yagi <i>et al.</i> , 2013)                                                                                                                                                 |
| <b><i>petL-5</i></b> | 65716 | 100 | 40  | MORF2, MORF8, MORF9, OZ1, PPO1                    | (Tillich <i>et al.</i> , 2005; Bentolila <i>et al.</i> , 2012; Takenaka <i>et al.</i> , 2012; Zhang <i>et al.</i> , 2014; Sun <i>et al.</i> , 2015)                                                                                      |
| <i>rps12-i58</i>     | 69553 | 30  | 30  | OTP81/QED1 (PPR), MORF2, MORF8, MORF9, ORRM1, OZ1 | (Chateigner-Boutin & Small, 2007; Hammani <i>et al.</i> , 2009; Bentolila <i>et al.</i> , 2012; Takenaka <i>et al.</i> , 2012; Sun <i>et al.</i> , 2013; Sun <i>et al.</i> , 2015; Wagoner <i>et al.</i> , 2015)                         |

|                   |       |     |     |                                                    |                                                                                                                                                                                                           |
|-------------------|-------|-----|-----|----------------------------------------------------|-----------------------------------------------------------------------------------------------------------------------------------------------------------------------------------------------------------|
| <i>clpP</i> -559  | 69942 | 80  | 80  | CLB19 (PPR), MORF2, MORF9, ORRM1, OZ1              | (Tillich <i>et al.</i> , 2005; Chateigner-Boutin <i>et al.</i> , 2008; Takenaka <i>et al.</i> , 2012; Sun <i>et al.</i> , 2013; Sun <i>et al.</i> , 2015)                                                 |
| <i>rpoA</i> -200  | 78691 | 80  | 80  | CLB19 (PPR), MORF2, MORF9, OZ1                     | (Chateigner-Boutin & Small, 2007; Chateigner-Boutin <i>et al.</i> , 2008; Takenaka <i>et al.</i> , 2012; Sun <i>et al.</i> , 2015)                                                                        |
| <i>rpl23</i> -89  | 86055 | 80  | 80  | OTP80 (PPR), MORF2, MORF9, OZ1, PPO1               | (Chateigner-Boutin & Small, 2007; Hammani <i>et al.</i> , 2009; Takenaka <i>et al.</i> , 2012; Zhang <i>et al.</i> , 2014; Sun <i>et al.</i> , 2015)                                                      |
| <i>ndhB</i> -1481 | 94999 | 90  | 90  | OTP84 (PPR), MORF2, MORF8, MORF9, OZ1, PPO1        | (Tillich <i>et al.</i> , 2005; Hammani <i>et al.</i> , 2009; Bentolila <i>et al.</i> , 2012; Takenaka <i>et al.</i> , 2012; Zhang <i>et al.</i> , 2014; Sun <i>et al.</i> , 2015)                         |
| <i>ndhB</i> -1255 | 95225 | 100 | 100 | CREF7 (PPR), MORF2, MORF9, ORRM1, OZ1, PPO1        | (Tillich <i>et al.</i> , 2005; Takenaka <i>et al.</i> , 2012; Sun <i>et al.</i> , 2013; Yagi <i>et al.</i> , 2013; Zhang <i>et al.</i> , 2014; Sun <i>et al.</i> , 2015)                                  |
| <i>ndhB</i> -872  | 95608 | 90  | 90  | QED1 (PPR), MORF2, MORF9, ORRM1, OZ1, PPO1         | (Tillich <i>et al.</i> , 2005; Takenaka <i>et al.</i> , 2012; Sun <i>et al.</i> , 2013; Zhang <i>et al.</i> , 2014; Sun <i>et al.</i> , 2015; Wagoner <i>et al.</i> , 2015)                               |
| <i>ndhB</i> -836  | 95644 | 100 | 100 | OTP82 (PPR), MORF2, MORF8, MORF9, ORRM1, OZ1, PPO1 | (Tillich <i>et al.</i> , 2005; Bentolila <i>et al.</i> , 2012; Takenaka <i>et al.</i> , 2012; Hayes <i>et al.</i> , 2013; Sun <i>et al.</i> , 2013; Zhang <i>et al.</i> , 2014; Sun <i>et al.</i> , 2015) |
| <i>ndhB</i> -830  | 95650 | 100 | 100 | ELI1 (PPR), MORF2, MORF8, MORF9, ORRM1, OZ1, PPO1  | (Tillich <i>et al.</i> , 2005; Okuda <i>et al.</i> , 2009; Bentolila <i>et al.</i> , 2012; Takenaka <i>et al.</i> , 2012; Sun <i>et al.</i> , 2013; Zhang <i>et al.</i> , 2014; Sun <i>et al.</i> , 2015) |

|                  |        |     |     |                                                    |                                                                                                                                                                                                               |
|------------------|--------|-----|-----|----------------------------------------------------|---------------------------------------------------------------------------------------------------------------------------------------------------------------------------------------------------------------|
| <i>ndhB</i> -746 | 96419  | 100 | 100 | CRR22 (PPR), MORF2, MORF8, MORF9, OZ1              | (Tillich <i>et al.</i> , 2005; Bentolila <i>et al.</i> , 2012; Takenaka <i>et al.</i> , 2012; Zhang <i>et al.</i> , 2014; Sun <i>et al.</i> , 2015)                                                           |
| <i>ndhB</i> -586 | 96579  | 100 | 100 | MORF2, MORF8, MORF9, ORRM1, OZ1, PPO1              | (Tillich <i>et al.</i> , 2005; Bentolila <i>et al.</i> , 2012; Takenaka <i>et al.</i> , 2012; Sun <i>et al.</i> , 2013; Zhang <i>et al.</i> , 2014; Sun <i>et al.</i> , 2015)                                 |
| <i>ndhB</i> -467 | 96698  | 90  | 90  | CRR28 (PPR), MORF2, MORF8, MORF9, ORRM1, OZ1, PPO1 | (Tillich <i>et al.</i> , 2005; Okuda <i>et al.</i> , 2009; Bentolila <i>et al.</i> , 2012; Takenaka <i>et al.</i> , 2012; Sun <i>et al.</i> , 2013; Zhang <i>et al.</i> , 2014; Sun <i>et al.</i> , 2015)     |
| <i>ndhB</i> -149 | 97016  | 100 | 100 | MORF2, MORF9, PPO1                                 | (Tillich <i>et al.</i> , 2005; Takenaka <i>et al.</i> , 2012; Zhang <i>et al.</i> , 2014)                                                                                                                     |
| <i>ndhF</i> -290 | 112349 | 100 | 100 | OTP84/AtECB2 (PPR), MORF2, MORF8, MORF9, OZ1, PPO1 | (Tillich <i>et al.</i> , 2005; Hammani <i>et al.</i> , 2009; Tseng <i>et al.</i> , 2010; Bentolila <i>et al.</i> , 2012; Takenaka <i>et al.</i> , 2012; Zhang <i>et al.</i> , 2014; Sun <i>et al.</i> , 2015) |
| <i>ndhD</i> -887 | 116281 | 90  | 90  | CRR22 (PPR), MORF2, MORF9, ORRM1, OZ1, PPO1        | (Tillich <i>et al.</i> , 2005; Okuda <i>et al.</i> , 2009; Takenaka <i>et al.</i> , 2012; Sun <i>et al.</i> , 2013; Zhang <i>et al.</i> , 2014; Sun <i>et al.</i> , 2015)                                     |
| <i>ndhD</i> -878 | 116290 | 80  | 80  | CRR28 (PPR), MORF2, MORF9, ORRM1, OZ1, PPO1        | (Tillich <i>et al.</i> , 2005; Okuda <i>et al.</i> , 2009; Takenaka <i>et al.</i> , 2012; Sun <i>et al.</i> , 2013; Zhang <i>et al.</i> , 2014; Sun <i>et al.</i> , 2015)                                     |
| <i>ndhD</i> -674 | 116494 | 100 | 100 | OTP85 (PPR), MORF2, MORF9, ORRM1, OZ1, PPO1        | (Tillich <i>et al.</i> , 2005; Hammani <i>et al.</i> , 2009; Takenaka <i>et al.</i> , 2012; Sun <i>et al.</i> , 2013; Zhang <i>et al.</i> , 2014; Sun <i>et al.</i> , 2015)                                   |

|                       |        |     |     |                                                |                                                                                                                                                                                                                    |
|-----------------------|--------|-----|-----|------------------------------------------------|--------------------------------------------------------------------------------------------------------------------------------------------------------------------------------------------------------------------|
| <i>ndhD-383</i>       | 116785 | 100 | 100 | CRR21 (PPR), MORF2,<br>MORF8, MORF9, PPO1      | (Tillich <i>et al.</i> , 2005; Okuda <i>et al.</i> , 2007;<br>Bentolila <i>et al.</i> , 2012; Takenaka <i>et al.</i> , 2012;<br>Zhang <i>et al.</i> , 2014)                                                        |
| <i>ndhD-2</i>         | 117166 | 50  | 50  | CRR4 (PPR), MORF2, MORF8,<br>MORF9, OZ1, PPO1  | (Kotera <i>et al.</i> , 2005; Tillich <i>et al.</i> , 2005; Okuda<br><i>et al.</i> , 2006; Bentolila <i>et al.</i> , 2012; Takenaka <i>et al.</i> ,<br>2012; Zhang <i>et al.</i> , 2014; Sun <i>et al.</i> , 2015) |
| <b><i>ndhG-50</i></b> | 118858 | 100 | 50  | OTP82 (PPR), MORF2,<br>MORF9, ORRM1, OZ1, PPO1 | (Tillich <i>et al.</i> , 2005; Okuda <i>et al.</i> , 2010;<br>Takenaka <i>et al.</i> , 2012; Sun <i>et al.</i> , 2013; Zhang <i>et al.</i> ,<br>2014; Sun <i>et al.</i> , 2015)                                    |

---

**Table S3** *Trans*-factors involved in *petL-5* and/or *ndhG-50* editing

| Trans-factor | Gene ID           | Gene family                | Editing extent in the mutant (%) |             | Editing level change mutant :: WT |             | Reference                                                     |
|--------------|-------------------|----------------------------|----------------------------------|-------------|-----------------------------------|-------------|---------------------------------------------------------------|
|              |                   |                            | <i>petL</i>                      | <i>ndhG</i> | <i>petL</i>                       | <i>ndhG</i> |                                                               |
|              |                   |                            | -5                               | -50         | -5                                | -50         |                                                               |
|              |                   |                            |                                  |             |                                   |             | (Hammani <i>et al.</i> , 2009;                                |
| OTP82        | AT1<br>G080<br>70 | PPR                        | n/a                              | 1           | n/a                               | -99%        | Okuda <i>et al.</i> , 2010;<br>Kindgren <i>et al.</i> , 2015) |
| MORF2        | AT2<br>G334<br>30 | MORF                       | 65                               | 40          | -35%                              | -60%        | (Takenaka <i>et al.</i> , 2012)                               |
| MORF8        | AT3<br>G150<br>00 | MORF                       | 35                               | 72          | -60%                              | -6%         | (Bentolila <i>et al.</i> , 2012)                              |
| MORF9        | AT1<br>G114<br>30 | MORF                       | 0                                | 0           | -100%                             | -100%       | (Takenaka <i>et al.</i> , 2012)                               |
| ORRM1        | AT3<br>G209<br>30 | ORRM                       | 66                               | 8           | +1%                               | -94%        | (Sun <i>et al.</i> , 2013)                                    |
| PPO1         | AT4<br>G016<br>90 | Protoporphyrinogen oxidase | 65                               | 85          | -19%                              | -15%        | (Zhang <i>et al.</i> , 2014)                                  |
| OZ1          | AT5<br>G177<br>90 | RanBP2-type zinc finger    | 45                               | 0           | -42%                              | -100%       | (Sun <i>et al.</i> , 2015)                                    |

+ indicates increased editing extent compared to that of wild-type plants; - indicates decreased editing extent compared to that of wild-type plants. n/a, not assayed.

## References

- Bentolila S, Heller WP, Sun T, Babina AM, Friso G, van Wijk KJ, Hanson MR.** 2012. RIP1, a member of an Arabidopsis protein family, interacts with the protein RARE1 and broadly affects RNA editing. *Proceedings of the National Academy of Sciences, USA* **109**, E1453-1461.
- Cai W, Ji D, Peng L, Guo J, Ma J, Zou M, Lu C, Zhang L.** 2009. LPA66 is required for editing psbF chloroplast transcripts in Arabidopsis. *Plant Physiology* **150**, 1260-1271.
- Chateigner-Boutin AL, Ramos-Vega M, Guevara-Garcia A, et al.** 2008. CLB19, a pentatricopeptide repeat protein required for editing of rpoA and clpP chloroplast transcripts. *The Plant Journal* **56**, 590-602.
- Chateigner-Boutin AL, Small I.** 2007. A rapid high-throughput method for the detection and quantification of RNA editing based on high-resolution melting of amplicons. *Nucleic Acids Research* **35**, e114.
- Hammani K, Okuda K, Tanz SK, Chateigner-Boutin AL, Shikanai T, Small I.** 2009. A study of new Arabidopsis chloroplast RNA editing mutants reveals general features of editing factors and their target sites. *The Plant Cell* **21**, 3686-3699.
- Hayes ML, Giang K, Berhane B, Mulligan RM.** 2013. Identification of two pentatricopeptide repeat genes required for RNA editing and zinc binding by C-terminal cytidine deaminase-like domains. *The Journal of Biological Chemistry* **288**, 36519-36529.
- Kindgren P, Yap A, Bond CS, Small I.** 2015. Predictable alteration of sequence recognition by RNA editing factors from Arabidopsis. *The Plant Cell* **27**, 403-416.
- Kotera E, Tasaka M, Shikanai T.** 2005. A pentatricopeptide repeat protein is essential for RNA editing in chloroplasts. *Nature* **433**, 326-330.
- Okuda K, Chateigner-Boutin AL, Nakamura T, Delannoy E, Sugita M, Myouga F, Motohashi R, Shinozaki K, Small I, Shikanai T.** 2009. Pentatricopeptide repeat proteins with the DYW motif have distinct molecular functions in RNA editing and RNA cleavage in Arabidopsis chloroplasts. *The Plant Cell* **21**, 146-156.
- Okuda K, Hammani K, Tanz SK, Peng L, Fukao Y, Myouga F, Motohashi R, Shinozaki K, Small I, Shikanai T.** 2010. The pentatricopeptide repeat protein OTP82 is required for RNA editing of plastid ndhB and ndhG transcripts. *The Plant Journal* **61**, 339-349.
- Okuda K, Myouga F, Motohashi R, Shinozaki K, Shikanai T.** 2007. Conserved domain structure of pentatricopeptide repeat proteins involved in chloroplast RNA editing. *Proceedings*

of the National Academy of Sciences, USA **104**, 8178-8183.

**Okuda K, Nakamura T, Sugita M, Shimizu T, Shikanai T.** 2006. A pentatricopeptide repeat protein is a site recognition factor in chloroplast RNA editing. *The Journal of Biological Chemistry* **281**, 37661-37667.

**Robbins JC, Heller WP, Hanson MR.** 2009. A comparative genomics approach identifies a PPR-DYW protein that is essential for C-to-U editing of the Arabidopsis chloroplast accD transcript. *RNA* **15**(6): 1142-1153.

**Sun T, Germain A, Giloteaux L, Hammani K, Barkan A, Hanson MR, Bentolila S.** 2013. An RNA recognition motif-containing protein is required for plastid RNA editing in Arabidopsis and maize. *Proceedings of the National Academy of Sciences, USA* **110**, E1169-1178.

**Sun T, Shi X, Friso G, Van Wijk K, Bentolila S, Hanson MR.** 2015. A zinc finger motif-containing protein is essential for chloroplast RNA editing. *PLoS Genetics* **11**, e1005028.

**Takenaka M, Zehrmann A, Verbitskiy D, Kugelman M, Hartel B, Brennicke A.** 2012. Multiple organellar RNA editing factor (MORF) family proteins are required for RNA editing in mitochondria and plastids of plants. *Proceedings of the National Academy of Sciences, USA* **109**, 5104-5109.

**Tillich M, Funk HT, Schmitz-Linneweber C, Poltnigg P, Sabater B, Martin M, Maier RM.** 2005. Editing of plastid RNA in Arabidopsis thaliana ecotypes. *The Plant Journal* **43**, 708-715.

**Tseng CC, Sung TY, Li YC, Hsu SJ, Lin CL, Hsieh MH.** 2010. Editing of accD and ndhF chloroplast transcripts is partially affected in the Arabidopsis vanilla cream1 mutant. *Plant Molecular Biology* **73**(3): 309-323.

**Wagoner JA, Sun T, Lin L, Hanson MR.** 2015. Cytidine deaminase motifs within the DYW domain of two pentatricopeptide repeat-containing proteins are required for site-specific chloroplast RNA editing. *The Journal of Biological Chemistry* **290**, 2957-2968.

**Yagi Y, Tachikawa M, Noguchi H, Satoh S, Obokata J, Nakamura T.** 2013. Pentatricopeptide repeat proteins involved in plant organellar RNA editing. *RNA Biology* **10**, 1419-1425.

**Yu QB, Jiang Y, Chong K, Yang ZN.** 2009. AtECB2, a pentatricopeptide repeat protein, is required for chloroplast transcript accD RNA editing and early chloroplast biogenesis in Arabidopsis thaliana. *The Plant Journal* **59**, 1011-1023.

**Zhang F, Tang W, Hedtke B, Zhong L, Liu L, Peng L, Lu C, Grimm B, Lin R.** 2014. Tetrapyrrole biosynthetic enzyme protoporphyrinogen IX oxidase 1 is required for plastid RNA



editing. *Proceedings of the National Academy of Sciences, USA* **111**, 2023-2028.

**Zhou W, Cheng Y, Yap A, Chateigner-Boutin AL, Delannoy E, Hammani K, Small I, Huang J.** 2009. The Arabidopsis gene YS1 encoding a DYW protein is required for editing of rpoB transcripts and the rapid development of chloroplasts during early growth. *The Plant Journal* **58**, 82-96.
